# Supplementary material for: Why do patients discontinue fertility treatment? A systematic review of reasons and predictors of discontinuation in fertility treatment
Source: Oxford University Press journal article supplement (doi:10.1093/humupd/dms031), 2012-08-06
Supplement: dms031_Supplementary_Data.zip [file dms031_Supplementary_Data.zip]

Archive with 1 entries (1 files):
- dms031supp.pdf
